# Supplementary material
Source: publisher figshare collection journal article supplement (https://springernature.figshare.com/ndownloader/files/24754366)
Supplement: Supplementary file 1 [file 24754366]

## Additional file

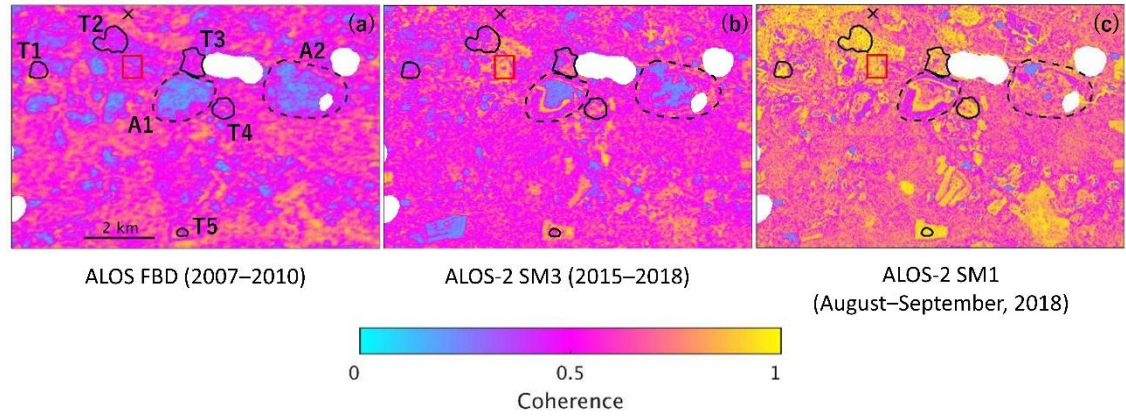

**Fig. S1** Averaged coherence map derived from (a) ALOS FBD, (b) ALOS-2 SM3, and (c) ALOS-2 SM1 data.

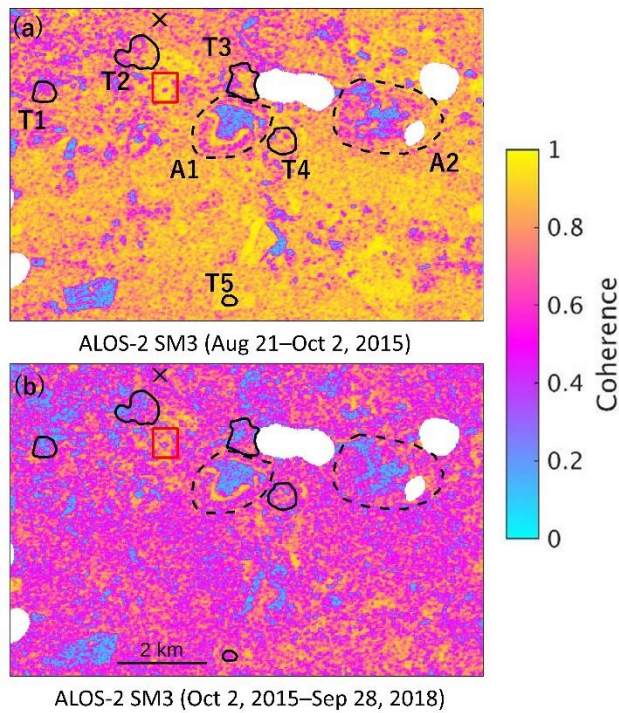

**Fig. S2** A comparison of coherence at different temporal baselines derived from ALOS-2 SM3 data spanning (a) 42 days and (b) 3 years.
